## 19 **Abstract**

20 Although metallic elements are required for plant growth, aluminum ions ( $Al^{+3}$ ) can be  
21 considered one of the major abiotic factors affecting productivity. In plants, the presence of  
22  $Al^{+3}$  can result in inhibition of root growth triggering water and nutrient deficiency. Plants  
23 under stress conditions undergo gene expression changes in specific genes or post-  
24 transcriptional gene regulators as miRNAs that can led to resistance. In this study, we  
25 investigated the miRNAs involved in the sugarcane response to aluminum stress. Four  
26 miRNA libraries were generated using sugarcane roots of two contrasting (tolerant and  
27 sensitive) sugarcane cultivars growing under aluminum stress to identify the miRNAs  
28 involved in the sugarcane response. Here we present the first miRNAs sequencing of  
29 sugarcane response under aluminum stress. The contrast of the cultivars seen in the field was  
30 reflected in the micro transcriptome with opposing expression profile. We selected 394  
31 differentially expressed miRNAs, in both cultivars, 22% were common between cultivars.  
32 Real time quantitative polymerase chain reaction was used to validate the differentially  
33 expressed miRNAs through high-throughput sequencing in sugarcane roots. Target genes  
34 prediction was also analyzed. Our results indicated miRNAs that modulated specific target  
35 genes involved in roots development and plant aluminum stress response. Those genes can  
36 be the answer to tolerance in sugarcane and used in breeding programs to develop tolerant  
37 cultivars.

38

## 39 **Introduction**

40 Sugarcane (*Saccharum* spp.) as an important source of sugar and ethanol became the  
41 third most produced commodities in the world (1.4G). In this context, Brazil figure as a  
42 major sugarcane producer (500M tons) followed by India (300M), China and Thailand [1].

43 The projections, based on the worldwide increasing demand for food and energy, are that  
44 sugarcane global production will increase by 21% until 2024. Production can be increased  
45 by increasing productivity and cropland expansion. The sugarcane crop expansion is evident  
46 in Brazil, where nowadays more than 9.5 million ha are used to cultivate sugarcane, but the  
47 demand for sugar and ethanol will increase to 10.5 million ha by the years 2023/24 [2].

48 Among the main factors that can affect agricultural productivity, soil has  
49 fundamental importance since it offers not only physical support but also water and the  
50 necessary nutrients for plant growth. Aluminum (Al) together with silicon and oxygen are  
51 the three most abundant elements in earth crust. Although metallic elements are required for  
52 plant growth, aluminum ions ( $Al^{+3}$ ) can be considered one of the major abiotic factors  
53 affecting agriculture productivity [3]. Al is a nonessential element naturally found in the  
54 soil but it is toxic and its bioavailability is highest on acidic soils (pH of 5.5 or lower),  
55 resulting in inhibition of root growth, architecture alteration and elongation disruption [3].  
56 Around the world 50% of arable soils are acidic [4], in Brazil acidic soil comprises 500  
57 million hectares, and 70% of this land been used for sugarcane plantation [5].

58 Most of the  $Al^{+3}$  is accumulated in the root apoplast and then translocated to other  
59 tissues [6], and the action of  $Al^{+3}$  on roots and plant development depends on the exposure  
60 time and aluminum concentration. The effects of  $Al^{+3}$  on plant metabolic process can be  
61 seem just few minutes after plant been exposed. In plants exposed to  $Al^{3+}$  ( $1.4\mu M$ ) it was  
62 detected in the nuclei inhibiting cell division and cell viability after 30 min (Silva et al.,  
63 2000). Due to the rapid reactivity of  $Al^{+3}$  the first changes occur in the cell wall, plasma  
64 membrane, cytoskeleton and the cell nucleus [7]. This process inhibits root growth and they  
65 become shorter and thicker, absorbing less nutrients and water, and transporting molecules  
66 more slowly through the cells [8, 9], triggering water stress and nutrient and mineral

67 deficiency [10]. In sugarcane, the inhibition of roots growth can reach 46% under Al stress  
68 [11].

69         Plants under stress conditions can undergo gene expression changes that can led to  
70 resistance. Those changes can be specific functional gene expression or post-transcriptional  
71 gene regulation. It can be achieved by the expression of transcriptions factors (TFs) like  
72 MYB proteins, a key player in the regulation of plant response abiotic stress [12], or small  
73 noncoding RNAs named microRNAs (miRNAs) important gene regulators at post-  
74 transcriptional levels. miRNAs are single strand RNA sequence, 20 to 24 nucleotides long,  
75 and in plants they act in the pos-transcriptional gene silence (PTGS) level [13, 14, 15]. The  
76 first identified miRNAs were involved in modulating physiological and biochemical process  
77 that regulate plant development and adaptation [16]. The miRNAs identified in different  
78 plants such as: *Arabidopsis thaliana* [17], *Triticum aestivum* L. [18], *Glycine max* [19],  
79 *Manihot esculenta* [20, 21], suggest that miRNA also plays an important role in the  
80 regulation of molecular responses to biotic and abiotic stress.

81         Over the last years, miRNAs have been intensively studied but not much is known  
82 about metal stress plant response, especially in crop plants. The available information about  
83 aluminum stress plant responses comes from model plants such as *Medicago truncatula* [22,  
84 23] and *Arabidopsis thaliana* [24, 25]. Under metal stress, the plant gene expression can be  
85 modified to regulate different mechanisms such complexation of excess metal, defense  
86 against oxidative stress and signal transduction for different biological process [26, 27].  
87 Some miRNAs such as miR159, miR160, miR319, and miR396 had been identified as down-  
88 regulated in *Medicago truncatula* seedling roots after 4 hours of under aluminum stress, their  
89 targets are transcription factors related to seed germination, embryo development, cold and  
90 drought response [23].

91 In sugarcane several miRNAs associated to cold [28] and drought [29, 30, 31]  
92 tolerance were identified, however, there is no data of miRNAs involvement in response to  
93 Al stress. Our goal is to understand the molecular mechanisms of abiotic stress tolerance in  
94 sugarcane and the role of miRNA's in this response to aluminum stress. In this study, we  
95 focused in differential miRNA expression analysis and quantitative real-time PCR (qRT-  
96 PCR) validation in sugarcane roots growing under increased level of aluminum ( $Al^{3+}$ ) to  
97 understand the molecular mechanisms of aluminum stress tolerance.

98

## 99 **Materials and methods**

100

### 101 **Plant materials and RNA isolation**

102

103 Pre-germinated plants from two sugarcane (*Saccharum* spp) cultivars, CTC-2,  
104 tolerant to aluminum stress (TAS) and RB-855453, sensitive to aluminum stress (SAS), were  
105 grown in a hydroponic system in a greenhouse at 26°C to 30°C range and natural dark/light  
106 cycles. For 30 days plants were kept in 16L container filled with standard hydroponic  
107 solution [32] before going under stress when plants were cultivated for seven days under two  
108 aluminum concentration (0.0 and 22L $\mu$ mol  $Al^{+3}$  L $^{-1}$ ) and pH 4.5. After seven days, roots  
109 were collected and immediately frozen in liquid nitrogen and stored at -80°C for further use.  
110 Total RNA was isolated from control and stressed plants root samples using the Sigma plant  
111 RNA kit (Sigma, Inc, USA). RNA quality and concentration were determined by Qubit 2.0  
112 fluorometer (Life Technologies, USA).

113

114

## 115 **miRNA library and sequencing**

116 cDNA libraries were generated using Illumina True-Seq small RNA prep (Illumina,  
117 USA) and sequenced using 35bp single end sequencing on MiSeq sequencer (Illumina, Inc,  
118 USA) following the manufacture instruction.

119

## 120 **Real time PCR of miRNAs**

121

122 In order to validate our miRNA transcriptome we performed a qPCR analysis of  
123 randomly selected miRNA using the Stem-loop and quantitative real time polymerase chain  
124 reaction (qRT-PCR) [33]. For cDNA synthesis, RevertAid First Strand cDNA Synthesis kit  
125 (Thermo Fisher Scientific, USA) was used following the manufacture instructions. For qRT-  
126 PCR experiments, cDNA concentration was standardized for each sample and dissociation  
127 curve analysis was performed to check primer specificity. The reaction was performed in 20  
128  $\mu$ L containing 1  $\mu$ L of RNA, DNase treated, 200U of RevertAid M-MuLV Reverse  
129 Transcriptase, 20 mM dNTPs, RiboLock RNase Inhibitor (20 U), 5X reaction buffer  
130 (Thermo Fisher Scientific, USA), RT specific Primer 1  $\mu$ M, dT primer (100  $\mu$ M), at 42°C  
131 for 60 minutes and 5 minutes at 70°C . Real time PCR was carried out in a Stratagene  
132 MX3005P thermocycler using SYBR Green Jump Start Taq Ready Mix (Sigma Aldrich,  
133 USA) for quantifying amplification results. Thermal cycling conditions were as follow: 94°C  
134 for 2 minutes followed by 40 cycles of 94°C for 15 s, 60°C for 1 minute and 72°C for 30  
135 seconds.

136 The miRNAs expression levels were quantified after normalization to 18SrRNA gene  
137 used as internal control. The gene specific primers used in the real time experiments and  
138 miRNAs sequences are in S2 and S3 Tables. For the RT qPCR experiment two time points  
139 were used, initial and 7 days after stress (DAS). miRNAs expression levels were analyzed

140 using MXPro qPCR software 4.10 version (Stratagene, USA). Three biological replicates  
141 were examined to ensure reproducibility.

142

### 143 **miRNA targets prediction and functional annotations**

144

145 The targets of the miRNAs were predicted using Mercator  
146 (<http://mapman.gabipd.org/web/guest/app/Mercator>) by searching for targets genes based in  
147 the MapMan "BIN" ontology, which is tailored for functional annotation of plant "omics"  
148 data [34]. The GO (Gene Ontology) categorization were listed as three independent  
149 hierarchies for biological process, cellular component and molecular function using UniProt  
150 Knowledgebase (<https://www.uniprot.org>) and QuickGO (EMBL-EBI,  
151 <https://www.ebi.ac.uk/QuickGO>) tools. The data of individual biological library were  
152 deposited to NCBI SRA database with SRA accession IDs: SRR9035251, SRR9035250,  
153 SRR9035245, SRR9035244, SRR9035249, SRR9035248, SRR9035243, SRR9035242,  
154 SRR9035253, SRR9035252, SRR9035247 and SRR9035246.

155

## 156 **Results**

157

### 158 **Construction and sequencing analysis of miRNAs library**

159

160 To identify the miRNAs involved in the aluminum stress response four-miRNA  
161 libraries, generated from the sugarcane roots of two contrasting sugarcane cultivars CTC-2  
162 (Tolerant Aluminum Stress, TAS) and RB-855453 (Sensitive Aluminum Stress, SAS), under  
163 aluminum stress for seven days, were sequenced using Illumina technology. Over 12 million

164 raw reads, with a Q-Score of 37 and 53% CG content, was obtained. After processing and  
165 filtering for poor quality sequence, 5.8 million from the CTC-2 (TAS) and 6.2 million reads  
166 from RB-855453 (SAS), clean sequences remained. About 20K reads were assembled,  
167 11.5K from RB-855453 (SAS) and 8.5K from CTC-2 (TAS). The size distribution of the  
168 miRNAs ranged from 17 to 28 nt, as it is been presented in (Fig 1). The majority of the  
169 reads were from 20 to 24nt in length with 21nt being the most redundant species for both  
170 cultivars. The size distribution of sugarcane roots small RNAs is consistent with results  
171 observed in other plants using a deep-sequencing approach [35, 36].

172

173 **Fig 1. Size distribution of miRNAs sequences in two sugarcane cultivars.**

174 (A) Abundance in tolerant cultivar. TAS C – Tolerant aluminum stress control; TAS S–  
175 Tolerant aluminum stress stressed; (B) Abundance in sensitive cultivar. SAS C – Sensitive  
176 aluminum stress control; SAS S – Sensitive aluminum stress stressed.

177

178 To identify the miRNAs involved in the sugarcane response to aluminum stress we  
179 selected the miRNAs differently expressed in both cultivars. A total of 394 differentially  
180 expressed miRNAs were identified (S1 Table); 104 were specifically in TAS and 116  
181 specifically in SAS and another set of 87 that were common between both cultivars TAS and  
182 SAS under aluminum stress (Fig. 2A). In the TAS cultivar, from the total miRNAs (191),  
183 52% had been upregulated while in the SAS cultivar the majority of the miRNAs (75%)  
184 were down regulated (Fig. 2B). As can be seen in Fig. 2C, the cultivars had opposing  
185 expression profile. For the TAS cultivar the majority of the miRNAs (64%) were induced  
186 while in the SAS cultivar the majority (85%) were repressed (S1 Table). Generally, plant  
187 miRNAs can be classified into several different families where the members have similar  
188 sequences. The miRNAs identified in sugarcane roots belong to 100 known families (S1



189 Fig.) and among them, the most abundant miRNA families were miRNA159, miRNA156,  
190 miRNA 162, miRNA 396 and miRNA 444 (Fig. 3).

191

192 **Fig 2. miRNAs expression profile.**

193 (A) Venn diagram showing miRNAs differently expressed in both cultivars; (B) The number  
194 of stress responsive miRNA is shown for each cultivar as well as the number of induced and  
195 repressed miRNAs under stress conditions; (C) Differential expression of the common  
196 miRNA between cultivars.

197

198 **Fig 3. Most abundant miRNAs families identified in sugarcane roots.**

199

200 Fourteen miRNAs were down-regulated, most of them in tolerant cultivar (TAS). Six  
201 were down-regulated in both cultivars (miR156, miR159, miR166, miR169, miR398,  
202 miR408) while three were down-regulated only in the sensitive cultivar. Two miRNAs  
203 showed to be up-regulated in the tolerant cultivar (miR168 and miR395) and contrasting  
204 expression was observed in 7 miRNAs (miR160, miR162, miR167, miR171, miR319,  
205 miR390, and miR396) Table 1.

206

207

208

209

210

211

212

213 **Table 1. Expression analysis (Log2FC) of identified miRNAs in the sugarcane**  
 214 **sequencing.**

| miRNA Family      |               | miRNA (reference)  | Log2FC <sup>1</sup> |       |
|-------------------|---------------|--------------------|---------------------|-------|
|                   |               |                    | TAS                 | SAS   |
| Down-regulated    | miR121        | miR121-1-npr (sit) | -4,88               | NR    |
|                   | miR122        | miR122-2-npr (sit) | -5,24               | NR    |
|                   | miR156        | miR156a-4 (sit)    | -2,95               | -1,19 |
|                   | miR159        | miR159a (sbi)      | -2,95               | -1,01 |
|                   | miR164        | miR164c (sit)      | NR                  | -2,17 |
|                   |               | miR164f-3p (zma)   | -1,36               | NR    |
|                   | miR166        | miR166a-5p (zma)   | -1,36               | -2,19 |
|                   | miR169        | miR169n-5p (zma)   | -1,36               | -1,19 |
|                   | miR393        | miR393h (gma)      | NR                  | -1,13 |
|                   |               | miR393c-5p (zma)   | -1,30               | NR    |
|                   | miR398        | miR398b-5p (zma)   | -1,36               | -1,19 |
|                   | miR408        | miR408 (csi)       | -1,36               | NR    |
|                   | miR444        | miR444f (osa)      | -2,36               | -1,59 |
|                   | miR2128       | miR2128a-3p (gma)  | -2,36               | NR    |
|                   | miR5568       | miR5568g-3p (sbi)  | NR                  | -2,78 |
| miR5568f-3p (sbi) |               | -1,36              | NR                  |       |
| miR6253           | miR6253 (osa) | -2,30              | NR                  |       |
| Up-regulated      | miR168        | miR168a-5p (zma)   | 3,05                | NR    |
|                   | miR395        | miR395a (sly)      | 4,85                | 1,12  |
| Constrasting      | miR160        | miR160e-5p (osa)   | -2,36               | 1,18  |
|                   | miR162        | miR162b (ptc)      | NR                  | 1,18  |
|                   |               | miR162b (gma)      | -1,36               | NR    |
|                   | miR167        | miR167h-3p (osa)   | 4,29                | -4,36 |
|                   | miR171        | miR171i (mdm)      | 3,34                | -2,78 |
|                   | miR319        | miR319-2 (sit)     | 2,14                | -2,01 |
|                   | miR390        | miR390a (cpa)      | NR                  | 1,18  |
| miR390a (ath)     |               | -1,36              | NR                  |       |
| miR396            | miR396d (zma) | 3,27               | -4,30               |       |

215 <sup>1</sup>NR: not responsive.

216

217

## 218 miRNA transcriptome validation by RT-qPCR

219

220 RT-qPCR was used to validate the differentially expressed miRNAs through high-  
 221 throughput sequencing in sugarcane roots. Six miRNAs (miR167, miR168, miR6253,  
 222 miR159, miR156, miR121) modulated by aluminum were randomly selected for validation.

223 The results of all these miRNAs confirmed by RT-qPCR were consistent with the high-  
224 throughput sequencing analyses (Fig. 4).

225

226 **Fig 4. Relative expression of six identified miRNAs in sugarcane.**

227 Tolerant cultivar (TAS) and sensitive cultivar (SAS).

228

## 229 **Prediction of miRNA targets and GO annotation**

230

231 Because plants miRNAs sequences are highly complementary to their targets, they  
232 can be used to predict their targets [37]. To better understand the possible biological function  
233 of the miRNAs the sequences of the most abundant microRNA families were used to search  
234 for their targets using Mercator, that assigns functional terms to nucleotide sequences (Table  
235 2; S4 Table). The functional annotation of the targets is available in S4 Table. The genes and  
236 transcription factors regulated by the miRNAs participate in several biological processes:  
237 cell growth regulation (*LRR protein*), Auxin-activated signaling pathway (*Auxin response*  
238 *factor*), osmotic stress response (*CBL-interacting protein kinase 1*), growth negative  
239 regulation (*MYB domain protein 33*), among others.

240

241

242

243

244

245

246

247

248 **Table 2. Predicted miRNA targets.**

| <b>miRNA</b> | <b>Potential targets by Mercator</b>          |
|--------------|-----------------------------------------------|
| 156          | <i>Squamosa promoter-binding protein-like</i> |
| 159          | <i>MYB domain protein; LRR protein</i>        |
| 160          | <i>Auxin response factor</i>                  |
| 167          | <i>OsWAK; Copper-transporting ATPase PAA1</i> |
| 169          | <i>12-oxo-phytodienoic acid reductase</i>     |
| 319          | <i>MYB domain protein</i>                     |
| 396          | <i>Growth-regulating factor</i>               |
| 444          | <i>MADS-box transcription factor</i>          |

249

## 250 **Discussion**

251 Due to their regulatory role during plant development, the study of microRNAs  
252 associated to biotic and abiotic stress has increased significantly. Several miRNAs were  
253 identified in sugarcane in different tissues and stress conditions [29, 38] but none has been  
254 reported for sugarcane under aluminum stress. Here we report the first microtranscriptome  
255 associated with aluminum response in sugarcane. By comparing miRNA libraries sequences  
256 from the two contrasting cultivars, we were able to identify 394 differentially expressed  
257 miRNAs. Their size range from 17 to 25, with a majority between 20 and 24 nucleotides  
258 (Fig. 1), similar to the results reported for sugarcane under drought stress [29]. Small RNAs  
259 with different sizes may perform different functions. Twenty one nucleotide sRNAs are been  
260 associated to posttranscriptional gene silencing while 24nt mainly induce gene silencing by  
261 heterochromatin maintenance or RNA-Dependent DNA methylation [15, 39].

262 The contrast of the cultivars seen in the field was reflected in the microtranscriptome  
263 with opposing expression profile. For the tolerant cultivar (TAS) we observed that while  
264 64% of microRNAs are been induced in the tolerant cultivar, in the sensitive the majority of

265 microRNAs (85%) are been repressed under aluminum stress condition (Fig. 2C). Six of  
266 these miRNAs displayed the same expression profiles obtained by sequencing and RT-qPCR  
267 (Fig 4).

268 Those miRNAs were classified into different families (S1 Fig). The most abundant  
269 miRNA families were miRNA159, miRNA156, miRNA 162, miRNA 396 and miRNA 444  
270 (Fig. 3). Members of those miRNA families has been identified in several crops associated  
271 to different stress conditions [27]. In our study, spp-miRNA156 was down-regulated in both  
272 cultivars (Table 3) it contains complementary sequences to *SQUAMOSA (SQUA) promoter-*  
273 *binding-like (SPL)* target gene which encode plant-specific transcription factors (Table 4).  
274 miR156 was induced in soybean, wheat [40] and repressed in rice [41] under drought, it was  
275 also identified in sugarcane under drought but it was not differently expressed. In  
276 Arabidopsis miR156 and its target *SPL3* were associated to the temporal regulation of shoot  
277 development [42]. In *Medicago truncatula* it was also down-regulated after 4 hours of  
278 aluminum stress [23] and it was classified as an early expressed gene.

279 miRNA159 was also down-regulated in both sugarcane cultivars by Al<sup>+</sup> stress (Table  
280 3). It targets a *MYB domain protein*, a transcriptional regulatory region (Table 4). miR159  
281 has been associated with the control of multiple agronomic traits in rice [41], where it  
282 suppress cell division regulating negatively organ size. A transcriptome of a mutant  
283 suppressing miRNA159 revealed 7899 differentially expressed genes involved in several  
284 different pathways. Down-regulated genes were involved in pathways related to cell cycle,  
285 growth, signal transduction and hormone biosynthesis and signaling [41]. Although miR159  
286 had been associated to aluminum stress in rice [41] and *Medicago* [23] it was not found in  
287 sugarcane before.

288 Three other miRNAs were down-regulated under aluminum stress: miR169, which  
289 targets a *12-oxo-phytodienoic acid reductase2*; miR398 a *Cooper/zinc superoxide dismutase*,

290 involved in the cellular response to oxidative stress and miR444 that targets a *MAD-box*  
291 *transcription factor* associated to a wide range of functions including *e.g.* formation of  
292 flowers, flowering time control and vegetative development (Tables S3 and S4).

293         When we compared both cultivars TAS and SAS the miRNAs showed contrasting  
294 expression patterns under aluminum stress (Table 3). miRNA393h was down-regulated in  
295 the sensitive cultivar (SAS) and was not responsive in the tolerant cultivar (TAS) but  
296 miR393c, instead, showed to be down-regulated in the tolerant cultivar and not responsive  
297 in the sensitive. miR393 targets the *transport inhibitor response 1* gene (*TIR1*) (Table 3 and  
298 4), required for normal response to auxin, essential for many important biological process  
299 in plants [43, 44], including root development [45]. One of the first symptom of Al<sup>3+</sup> toxicity  
300 in plants is the reduction of lateral roots formation [46, 47]. Rice super expressing  
301 miRNA393a and miRNA393b shows a significant reduction in the lateral roots formation  
302 [48].

303         miRNA160 regulates the *Auxin response factor ARF* gene [49]. In our study,  
304 miRNA160 also showed a contrasting expression for the tested cultivars under Al<sup>3+</sup> stress.  
305 It was down-regulated in the tolerant cultivar (TAS) and up-regulated in the sensitive (SAS)  
306 (Table 3). The repressed expression of miR160 in the TAS cultivar will increase the ARF  
307 (*Auxin response factor*) leading to the inhibition of lateral root formation. Increased  
308 concentrations of Al<sup>3+</sup> also reduces the cytokine synthesis, transport, and increase abscisic  
309 acid concentration in roots [46, 50]. The same effect was observed in *Medicago truncatula*  
310 [23].

311         The predicted target for miR395 is the enzyme *Sulfate adenylyltransferase* (Table 4)  
312 important in adenosine 5'-phosphosulfate (ATPS) biosynthesis from ATP and inorganic  
313 sulfate [51]. It acts in the sulfate assimilation and reduction pathways in plants [52]. The up-  
314 regulation of miRNA395 in the TAS cultivar, can be an indicative that miR395 is modulating

315 sulfur metabolic pathway as a response of increased  $Al^{3+}$  concentration. In acid soils sulfate  
316 absorption is increased [53], sulfate is normally reduced in the leaves but it can also be  
317 reduced in the roots [54] producing several compounds including glutathione playing  
318 important role in stress tolerance [55]. In sorghum, *ATPS1* and *ATPS2* genes were repressed  
319 under oxidative stress [52, 56]. In *Arabidopsis thaliana*, it was also demonstrated that  
320 miR395 is involved in the oxidative stress response modulating sulfur metabolic pathway  
321 [57].

322 Our results show that miRNA390 is down-regulated in TAS and up-regulated in SAS  
323 cultivar, it targets a *GTP-binding protein* (Tables 3 and 4). The repression of miR390  
324 observed in TAS cultivar will lead to an increase in the expression of *GTP-binding protein*.  
325 Early signaling events in plant defense responses may involve ion channels, GTP-binding  
326 proteins and/or other signaling components [58]. It is well known that under adverse  
327 conditions, plant perceives a stress signal and transmits the information through signal  
328 transduction to the nucleus, resulting in altered physiological responses for surviving [59].

329 miRNA162 targets a *DICER-LIKE1 (DCL1)* an RNaseIII domain-containing protein  
330 responsible for the miRNAs synthesis [60, 61]. In our study miR162 was down-regulated in  
331 TAS and up-regulated in SAS. miRNA168 is also involved in the miRNA biogenesis  
332 targeting *Argonaute 1 AGO1* [62, 63]. miR162 and miR168 had been associated to the  
333 modulation of Cd stress in rice where both were down-regulated [63]. The authors suggested  
334 that the complexity of miRNA/target regulation and the altered expression of these miRNAs  
335 suggested that negative feedback regulatory circuits of the miRNA processing pathways  
336 might be highly active during Cd stress.

337 Our results show that in the TAS cultivar, the miRNAs 167, 171, 319 and 396 were  
338 up-regulated while in SAS they were down-regulated. miRNA171 and miR319 were also  
339 up-regulated in *M. truncatula* response to Al stress [21], the same for miRNA396 up-

340 regulated in soybean in response to Al ([64]. In barley'roots, from XZ29 a genotype Al-  
341 tolerant, under aluminum stress, miRNA 319 was up-regulated while miRNA396 was down-  
342 regulated [65].

343 miRNAs 171 and miR396 have been reported as part of the answer to abiotic stress  
344 regulation [66]. Under Al<sup>3+</sup> stress, some genes such as *ARF*, domain-containing *Cation-*  
345 *transporting ATPase* and *MYB*, were found to be cleaved in soybean [64]. The target genes  
346 for miRNAs 167 e 319 are *ATPase activity* and *MYB domain*, respectively, act on ion  
347 homeostasis, negative regulation of growth and positive regulation of abscisic acid-activated  
348 signaling pathway. Aluminum can trigger protective mechanisms involving miRNAs that  
349 can improve the plant's tolerance to Al toxicity [64].

350

## 351 **Conclusions**

352 This is the first study of global identification of miRNAs responsive to aluminum  
353 stress in contrasting sugarcane cultivars. The study provides a basis for the understanding of  
354 molecular mechanisms associated with tolerance in sugarcane under aluminum stress  
355 indicating miRNAs that modulate specific target genes involved in roots development and  
356 plant aluminum stress response.

357

## 358 **References**

- 359 1. Food and Agriculture Organization of the United Nations – FAOSTAT. 2017. Available  
360 from: <http://www.fao.org/faostat/en/#data/QC/visualize>
- 361 2. Outlook Fiesp. 2013. Projeções para o agronegócio brasileiro. Outlook Fiesp 2023  
362 projeções para o agronegócio brasileiro/Federação das indústrias do estado de São Paulo –



- 363 São Paulo: FIESP, 115p. Available from:  
364 <http://bibspi.planejamento.gov.br/handle/iditem/317>
- 365 3. Bhalerao SA, Prabhu DV. Aluminium toxicity in plants - A review. *J Applicable Chem.*  
366 2013;2: 447-474.
- 367 4. von Uexküll HR, Mutert E. Global extent, development and economic impact of acid soils.  
368 In: Date RA, Grundon NJ, Raymet GE, Probert ME, editors. *Plant-soil interaction at low*  
369 *pH: principles and management.* Kluwer Academic Publishers, Dordrecht, the Netherlands;  
370 1995.
- 371 5. Vitorello VA, Capaldi FR, Stefanuto VA. Recent advances in aluminum toxicity and  
372 resistance in higher plants. *Braz J Plant Physiol.* 2005;17: 129-143.  
373 <http://dx.doi.org/10.1590/S1677-04202005000100011>
- 374 6. Doncheva S, Amenos M, Poschenrieder C, Barcelo J. Root cell patterning: a primary target  
375 for aluminum toxicity in maize. *J Exp Bot.* 2005;56: 1213–1220.  
376 <https://doi.org/10.1093/jxb/eri115>
- 377 7. Silva IR, Smyth TJ, Moxley DF, Carter TE, Allen NS, Rufty TW. Aluminum  
378 accumulation at nuclei of cells in the root tip. Fluorescence detection using lumogallion  
379 and confocal laser scanning microscopy. *Plant Physiol.* 2000;123: 543-552.  
380 <https://doi.org/10.1104/pp.123.2.543>
- 381 8. Drummont RD, Guimarães TC, Felix J, Ninamango-Cárdenas FR, Carneiro NP, Paiva E,  
382 Menossi M. Prospecting sugarcane genes involved in aluminum tolerance. *Genet Mol Biol.*  
383 2001;24: 221-230. <http://dx.doi.org/10.1590/S1415-47572001000100029>
- 384 9. Gupta N, Gaurav SS, Kumar A. Molecular basis of aluminium toxicity in plants: A review.  
385 *Am J Plant Sci.* 2013;4: 21-37. <http://dx.doi.org/10.4236/ajps.2013.412A3004>

- 386 10. Blamey FPC. The role of the root cell wall in aluminum toxicity. In: N. Ae, J. Arihara, K.  
387 Okada, A. Srinivasan, editors. Plant Nutrient Acquisition. New Perspectives, Springer  
388 Verlag, New York; 2001. pp. 201-226.
- 389 11. Watt D. Aluminum-responsive genes in sugarcane: identification and analysis of  
390 expression under oxidative stress. J Exp Bot. 2003;54(385): 1163-1174.  
391 <https://doi.org/10.1093/jxb/erg128>
- 392 12. Golldack D, Li C, Mohan H, Probst N. Tolerance to drought and salt stress in plants:  
393 unraveling the signaling networks. Front Plant Sci. 2014;5: 151.  
394 <https://doi.org/10.3389/fpls.2014.00151>
- 395 13. Gupta OP, Sharma P, Gupta RK, Sharma I. MicroRNA mediated regulation of metal  
396 toxicity in plants: present status and future perspectives. Plant Mol Biol. 2014;84: 1–18.  
397 <https://doi.org/10.1007/s11103-013-0120-6>
- 398 14. Jones-Rhoades MW, Bartel DP, Bartel B. MicroRNAs and their regulatory roles in plants.  
399 Annu Rev Plant Biol. 2006;57: 19-53.  
400 <https://doi.org/10.1146/annurev.arplant.57.032905.105218>
- 401 15. Zhang H, Zhu JK. RNA-directed DNA methylation. Curr Opin Plant Biol. 2011;14(2):  
402 142–147. <https://doi.org/10.1016/j.pbi.2011.02.003>
- 403 16. Li C, Zhang B. MicroRNAs in control of plant development. J Cell Physiol. 2016;231(2):  
404 303–313. <https://doi.org/10.1002/jcp.25125>
- 405 17. Sunkar RW, Zhu JK. Novel and stress-regulated microRNAs and other small RNAs from  
406 Arabidopsis. Plant Cell. 2014;16(8): 2001–2019. <https://doi.org/10.1105/tpc.104.022830>
- 407 18. Sun, F, Guo G, Du J, Guo W, Peng H, Ni Z, Sun Q, Yao Y. Whole-genome discovery of  
408 miRNAs and their targets in wheat (*Triticum aestivum* L.). BMC Plant Biol. 2014;14: 142.  
409 <https://doi.org/10.1186/1471-2229-14-142>

- 410 19. Kulcheski FR, Oliveira LFV, Molina LG, Almerão MP, Rodrigues FA, Marcolino J,  
411 Barbosa JF, Stolf-Moreira R, Nepomuceno AL, Marcelino-Guimarães FC, Abdelnoor RV,  
412 Nascimento LC, Carazzolle MF, Pereira GAG, Margis R. Identification of novel soybean  
413 microRNAs involved in abiotic and biotic stresses. *BMC Genomics*. 2011;12: 307.  
414 <https://doi.org/10.1186/1471-2164-12-307>
- 415 20. Pérez-Quintero A, Quintero A, Urrego O, Vanegas P, López C. Bioinformatic  
416 identification of cassava miRNAs differentially expressed in response to infection by  
417 *Xanthomonas axonopodis* pv. *manihotis*. *BMC Plant Biol*. 2012;12: 29.  
418 <https://doi.org/10.1186/1471-2229-12-29>
- 419 21. Su Y, Zhang Y, Huang N, Liu F, Su W, Xu L, Ahmad W, Wu Q, Guo J, Que Y. Small  
420 RNA sequencing reveals a role for sugarcane miRNAs and their targets in response to  
421 *Sporisorium scitamineum* infection. *BMC Genomics*. 2017;18(1): 325.  
422 <https://doi.org/10.1186/s12864-017-3716-4>
- 423 22. Zhou ZS, Huang SQ, Yang ZM. Bioinformatic identification and expression analysis of  
424 new microRNAs from *Medicago truncatula*. *Biochem Biophys Res Commun*.  
425 2008;374(3): 538–542. <https://doi.org/10.1016/j.bbrc.2008.07.083>
- 426 23. Chen L, Wang T, Zhao M, Tian Q, Zhang W. Identification of aluminum-responsive  
427 microRNAs in *Medicago truncatula* by genome-wide high-throughput sequencing. *Planta*.  
428 2012;235(2): 375–386. <https://doi.org/10.1007/s00425-011-1514-9>
- 429 24. Si-Ammour A, Windels D, Arn-Boulidoires E, Kutter C, Ailhas J, Meins F, Vazquez F.  
430 miR393 and secondary siRNAs regulate expression of the TIR1/AFB2 auxin receptor  
431 clade and auxin-related development of Arabidopsis leaves. *Plant Physiol*. 2011;157(2):  
432 683-691. <https://doi.org/10.1104/pp.111.180083>
- 433 25. Sunkar R, Kapoor A, Zhu JK. Posttranscriptional induction of two Cu/Zn superoxide  
434 dismutase genes in Arabidopsis is mediated by downregulation of miR398 and important

- 435 for oxidative stress tolerance. *Plant Cell*. 2006;18(8): 2051–2065.  
436 <https://doi.org/10.1105/tpc.106.041673>
- 437 26. Gielen H, Remans T, Vangronsveld J, Cuypers A. MicroRNAs in metal stress: specific  
438 roles or secondary responses? *Int J Mol Sci*. 2012;13(12): 15826-15847.  
439 <https://doi.org/10.3390/ijms131215826>
- 440 27. He H, He L, Gu M. Role of microRNAs in aluminum stress in plants. *Plant Cell Rep*.  
441 2014;33(6): 831–836. <https://doi.org/10.1007/s00299-014-1565-z>
- 442 28. Thiebaut F, Grativol C, Carnavale-Bottino, M, Rojas, CA, Tanurdzic, LOS, Farinelli, L,  
443 Martienssen RA, Hemerly AS, Ferreira PC. Computational identification and analysis of  
444 novel sugarcane microRNAs. *BMC Genomics*. 2012;13: 290.  
445 <https://doi.org/10.1186/1471-2164-13-290>.
- 446 29. Ferreira TH, Gentile A, Vilela RD, Costa GGL, Dias LI, Endres L, Menossi M.  
447 microRNAs associated with drought response in the bioenergy crop sugarcane (*Saccharum*  
448 spp.). *PLoS One* 2012;7(10): e46703. <https://doi.org/10.1371/journal.pone.0046703>
- 449 30. Gentile A, Ferreira TH, Mattos RS, Dias LI, Hoshino AA, Carneiro MS, Souza GM, Calsa  
450 T Jr, Nogueira RM, Endres L, Menossi M. Effects of drought on the microtranscriptome of  
451 field-grown sugarcane plants. *Planta*. 2013;237(3): 783–798.  
452 <https://doi.org/10.1007/s00425-012-1795-7>
- 453 31. Gentile A, Dias LI, Mattos RS, Ferreira TH and Menossi M. MicroRNAs and drought  
454 responses in sugarcane. *Front Plant Sci*. 2015;6: 58.  
455 <https://doi.org/10.3389/fpls.2015.00058>
- 456 32. Hoagland DR, Arnon DI. The water-culture method for growing plants without soil. *Circ -*  
457 *Calif Agric Exp Stn*. 1950;347: 1-32.

- 458 33. Varkonyi-Gasic E, Hellens RP. Quantitative stem-loop RT-PCR for detection of  
459 microRNAs. *Methods Mol Biol.* 2011;744: 145–157. [https://doi.org/10.1007/978-1-61779-](https://doi.org/10.1007/978-1-61779-123-9_10)  
460 123-9\_10
- 461 34. Lohse M, Nagel A, Herter T, May P, Schroda M, Zrenner R, Tohge T, Fernie AR, Stitt M,  
462 Usadel B. Mercator: a fast and simple web server for genome scale functional annotation  
463 of plant sequence data. *Plant Cell Environ.* 2013;37(5): 1250-1258.  
464 <https://doi.org/10.1111/pce.12231>
- 465 35. Ballén-Taborda PG, Ayling S, Rodríguez-Zapata F, Lopez-Lavalle LAB, Duitama J,  
466 Tohme J. Identification of Cassava microRNAs under abiotic stress. *Int J Genomics.*  
467 2013;857986. <http://dx.doi.org/10.1155/2013/857986>
- 468 36. Zhou J, Cheng Y, Yin M, Yang E, Gong W, Liu C, Zheng X, Deng K, Ren Z, Zhang Y.  
469 Identification of Novel miRNAs and miRNA expression profiling in wheat hybrid  
470 necrosis. *PLoS One.* 2015;10(2): e011757. <https://doi.org/10.1371/journal.pone.0117507>
- 471 37. Rhoades MW, Reinhart BJ, Lim LP, Burge CB, Bartel B, Bartel DP. Prediction of plant  
472 microRNA targets. *Cell* 2002;110(4): 513–520. [https://doi.org/10.1016/S0092-](https://doi.org/10.1016/S0092-8674(02)00863-2)  
473 8674(02)00863-2
- 474 38. Ortiz-Morea FA, Vicentini R, Silva GFF, Silva EM, Carrer H, Rodrigues AP, Nogueira  
475 FT. Global analysis of the sugarcane microtranscriptome reveals a unique composition of  
476 small RNAs associated with axillary bud outgrowth. *J Exp Bot.* 2013;64(8): 2307–2320.  
477 <https://doi.org/10.1093/jxb/ert089>
- 478 39. Lewsey MG, Hardcastle TJ, Melnyk CW, Molnar A, Valli A, Urich MA, Nery JR,  
479 Baulcombe DC, Ecker JR. Mobile small RNAs regulate genome-wide DNA methylation.  
480 *Proc Natl Acad Sci USA.* 2016;113(6): E801–E810.  
481 <https://doi.org/10.1073/pnas.1515072113>

- 482 40. Kantar M, Lucas SJ, Budak H. miRNA expression patterns of *Triticum dicoccoides* in  
483 response to shock drought stress. *Planta*. 2011;233(3): 471-484.  
484 <https://doi.org/10.1007/s00425-010-1309-4>
- 485 41. Zhao Y, Wen H, Teotia S, Du Y, Zhang J, Li J, Sun H, Tang G, Peng T, Zhao Q.  
486 Suppression of microRNA159 impacts multiple agronomic traits in rice (*Oryza sativa* L.).  
487 *BMC Plant Biol*. 2017;17(1): 215. <https://doi.org/10.1186/s12870-017-1171-7>
- 488 42. Wu G, Poethig RS. Temporal regulation of shoot development in *Arabidopsis thaliana* by  
489 miR156 and its target SPL3. *Development*. 2006;133(18): 3539–3547.  
490 <https://doi.org/10.1242/dev.02521>
- 491 43. Navarro L, Dunoyer P, Jay F, Arnold B, Dharmasiri N, Estelle M, Voinnet O, Jones JD. A  
492 plant miRNA contributes to antibacterial resistance by repressing auxin signaling. *Science*.  
493 2006;312(5772): 436-439. <https://doi.org/10.1126/science.1126088>
- 494 44. Dharmasiri N, Dharmasiri S, Estelle M. The F-box protein TIR1 is an auxin receptor.  
495 *Nature*. 2005;435(7041): 441-445. <https://doi.org/10.1038/nature03543>
- 496 45. Lima JC, Arenhart RA, Margis-Pinheiro M, Margis R. Aluminum triggers broad changes  
497 in microRNA expression in rice roots. *Genet Mol Res*. 2011;10(4): 2817–2832.  
498 <https://doi.org/10.4238/2011.November.10.4>
- 499 46. Bennet RJ, Breen CM. The aluminium signal: New dimensions to mechanisms of  
500 aluminium tolerance. *Plant and Soil*. 1991;134: 153-166.  
501 <https://doi.org/10.1007/BF00010728>
- 502 47. Dantas ACM, Fortes GRL, Silva JB, Nezi NA, Rodrigues AC. Tolerância ao alumínio em  
503 porta-enxertos somaclonais de macieira cultivados em solução nutritiva. *Pesq agropec bras*.  
504 2001;36(4): 615-623. <http://dx.doi.org/10.1590/S0100-204X2001000400004>
- 505 48. Bian H, Xie Y, Guo F, Han N, Ma S, Zeng Z, Wang J, Yang Y, Zhu M. Distinctive  
506 expression patterns and roles of the miRNA393/TIR homolog module in regulating flag

- 507 leaf inclination and primary and crown root growth in rice (*Oryza sativa*). *New Phytol.*  
508 2012;196(1): 149-161. <https://doi.org/10.1111/j.1469-8137.2012.04248.x>
- 509 49. Fahlgren N, Howell MD, Kasschau KD, Chapman EJ, Sullivan CM, Cumbie JS, Givan  
510 SA, Law TF, Grant SR, Dangl JL, Carrington JC. High-Throughput sequencing of  
511 Arabidopsis microRNAs: evidence for frequent birth and death of miRNA genes. *PLoS*  
512 *One.* 2007;2(2): e219. <https://doi.org/10.1371/journal.pone.0000219>
- 513 50. Rengel Z. Role of calcium in aluminium toxicity. *New Phytol.* 1992;121(4): 499-513.  
514 <https://doi.org/10.1111/j.1469-8137.1992.tb01120.x>
- 515 51. Koprivova A, Kopriva S. Sulfation pathways in plants. *Chem Biol Interact.* 2016;259: 23-  
516 30. <https://doi.org/10.1016/j.cbi.2016.05.021>
- 517 52. Akbudak MA, Filiz E. Genome-wide analyses of ATP sulfurylase (ATPS) genes in higher  
518 plants and expression profiles in sorghum (*Sorghum bicolor*) under cadmium and salinity  
519 stresses. *Genomics.* 2018;S0888-7543(18): 30161-30167.  
520 <https://doi.org/10.1016/j.ygeno.2018.03.013>
- 521 53. Lin W. Inhibition of anion transport in corn root protoplasts. *Plant Physiol.* 1981;68(2):  
522 435-438. <https://doi.org/10.1104/pp.68.2.435>
- 523 54. Pate JS. Roots as organs of assimilation of sulfate. *Science.* 1965;149(3683): 547- 548.  
524 <https://doi.org/10.1126/science.149.3683.547>
- 525 55. Cheng MC, Ko K, Chang WL, Kuo WC, Chen GH, Lin TP. Increased glutathione  
526 contributes to stress tolerance and global translational changes in Arabidopsis. *Plant J.*  
527 2015;83(5): 926-939. <https://doi.org/10.1111/tpj.12940>
- 528 56- Anjum NA, Gill R, Kaushik M, Hasanuzzaman M, Pereira E, Ahmad I, Tuteja N, Gill SS.  
529 ATP-sulfurylase, sulfur-compounds, and plant stress tolerance. *Front Plant Sci.* 2015;6:  
530 210. <https://doi.org/10.3389/fpls.2015.00210>

- 531 57. Li L, Yi H, Xue M, Yi M. miR398 and miR395 are involved in response to SO<sub>2</sub> stress in  
532 *Arabidopsis thaliana*. *Ecotoxicology*. 2017;26(9): 1181-1187.  
533 <https://doi.org/10.1007/s10646-017-1843-y>
- 534 58. Yang Y, Shah J, Klessig DF. Signal perception and transduction in plant defense response.  
535 *Genes & Dev*. 1997;11(13): 1621-1639. <https://doi.org/10.1101/gad.11.13.1621>
- 536 59. Zhen Y, Qi JL, Wang SS, Su J, Xu GH, Zhang MS, Miao L, Peng XX, Tian D, Yang YH.  
537 Comparative proteome analysis of differentially expressed proteins induced by Al toxicity  
538 in soybean. *Physiol Plant*. 2007;131(4): 542–554. [https://doi.org/10.1111/j.1399-](https://doi.org/10.1111/j.1399-3054.2007.00979.x)  
539 [3054.2007.00979.x](https://doi.org/10.1111/j.1399-3054.2007.00979.x)
- 540 60. Schauer SE, Jacobsen SE, Meinke DW, Ray A. DICER-LIKE1: blind men and elephants  
541 in *Arabidopsis* development. *Trends Plant Sci*. 2002;7(11): 487–491.  
542 [https://doi.org/10.1016/S1360-1385\(02\)02355-5](https://doi.org/10.1016/S1360-1385(02)02355-5)
- 543 61. Xie Z, Kasschau KD, Carrington JC. Negative feedback regulation of Dicer-Like1 in  
544 *Arabidopsis* by microRNA-Guided mRNA degradation. *Curr Biol*. 2003;13(9): 784-789.  
545 [https://doi.org/10.1016/S0960-9822\(03\)00281-1](https://doi.org/10.1016/S0960-9822(03)00281-1)
- 546 62. Voinnet O. Origin, biogenesis, and activity of plant microRNAs. *Cell*. 2009;136(4): 669-  
547 687. <https://doi.org/10.1016/j.cell.2009.01.046>
- 548 63. Ding Y, Chen Z, Zhu C. Microarray-based analysis of cadmium-responsive microRNAs  
549 in rice (*Oryza sativa*). *J Exp Bot*. 2011;62(10): 3563-3573.  
550 <https://doi.org/10.1093/jxb/err046>
- 551 64. Zeng QY, Yang CY, Ma QB, Li XP, Dong WW, Nian H. Identification of wild soybean  
552 miRNAs and their target genes responsive to aluminum stress. *BMC Plant Biol*. 2012;12:  
553 182. <https://doi.org/10.1186/1471-2229-12-182>



554 65. Wu L, Yu J, Shen Q, Huang L, Wu D, Zhang G. Identification of microRNAs in response  
555 to aluminum stress in the roots of Tibetan wild barley and cultivated barley. BMC  
556 Genomics. 2018;19(1): 560. <https://doi.org/10.1186/s12864-018-4953-x>

557 66. Lima JC, Loss-Morais G, Margis R. MicroRNAs play critical roles during plant  
558 development and in response to abiotic stresses. Genet Mol Biol. 2012;35: 1069-1077.  
559

## 560 **Supporting information**

561 **S1 Fig. Summary of identified miRNA families in sugarcane and number of miRNAs**  
562 **per family.**

563 (TIF)

564 **S1 Table. Stress-responsive miRNAs identified in TAS and SAS.**

565 (DOCX)

566 **S2 Table. The primer sequences used in the qRT-PCR validation.**

567 (DOCX)

568 **S3 Table. miRNAs sequences evaluated.**

569 (DOCX)

570 **S4 Table. Distribution of predicted miRNA targets genes.** Functional annotation of target  
571 genes regulated by the most abundant miRNA families differentially expressed.

572 (DOCX)

573

## 574 **Author Contributions**

575 **Conceived and designed the experiments:** SMZ; KRK;

576 **Performed the experiments:** RGS; TMR;

577 **Analyzed the data:** SMZ; RGS; TMR; KRK; PK;

578 **Contributed reagents/materials/analysis tools:** SMZ; KRK;

579 **Wrote the paper:** RGS; SCF; SMZ;

580

**(A)**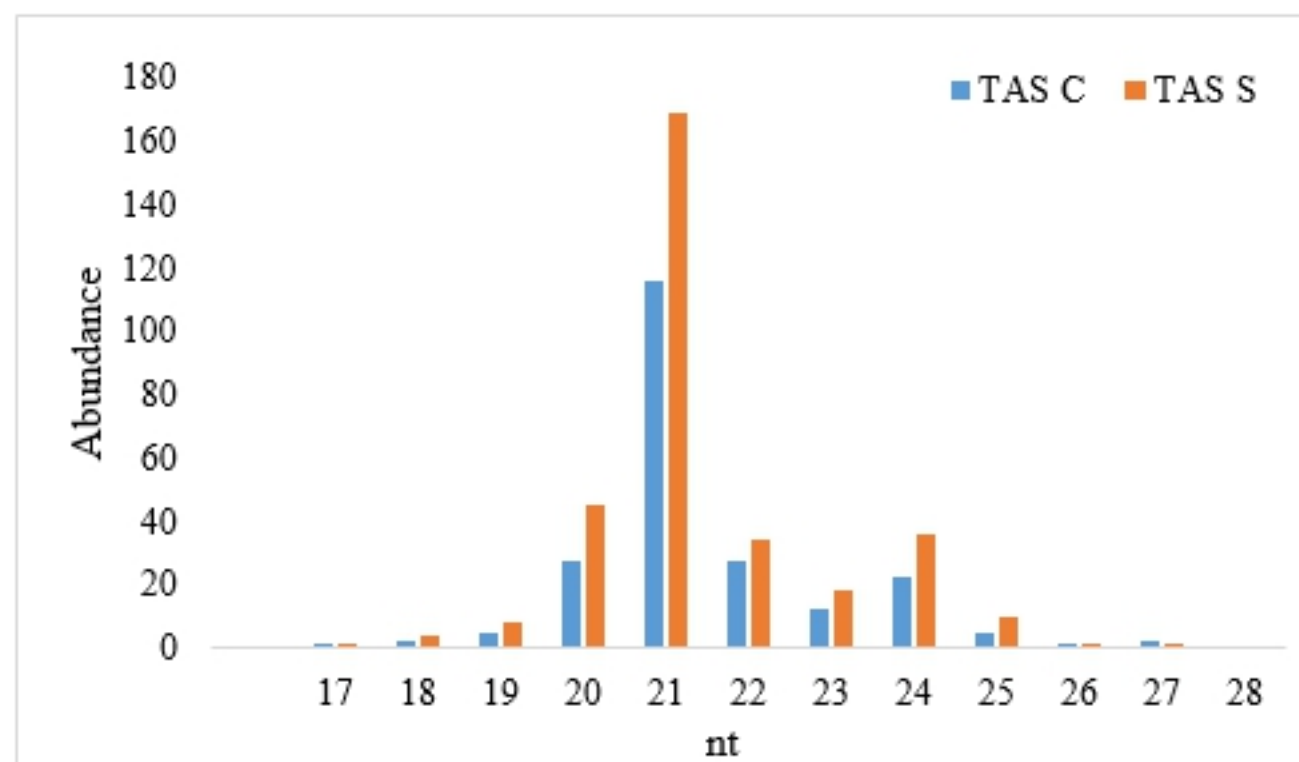**(B)**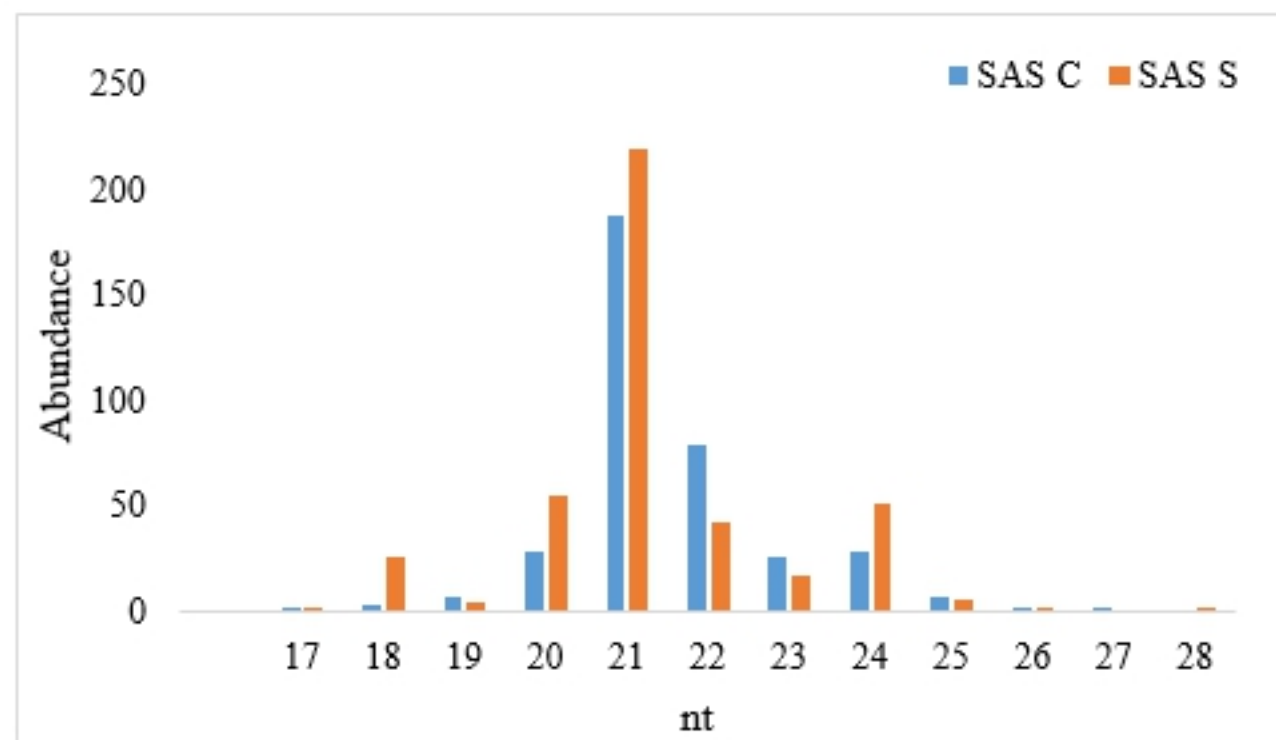

Figure

(A)

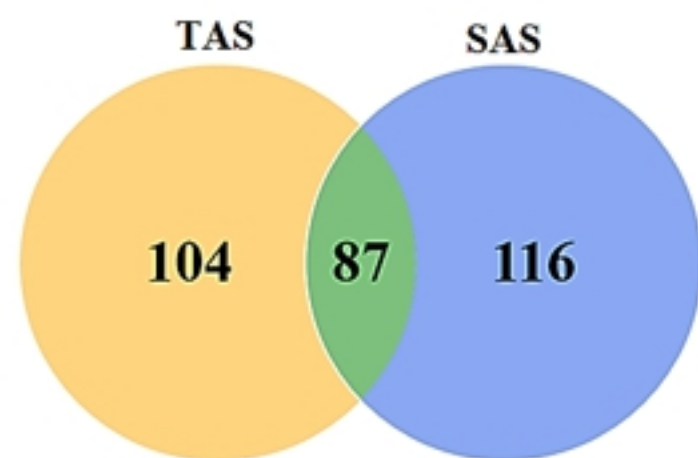

(B)

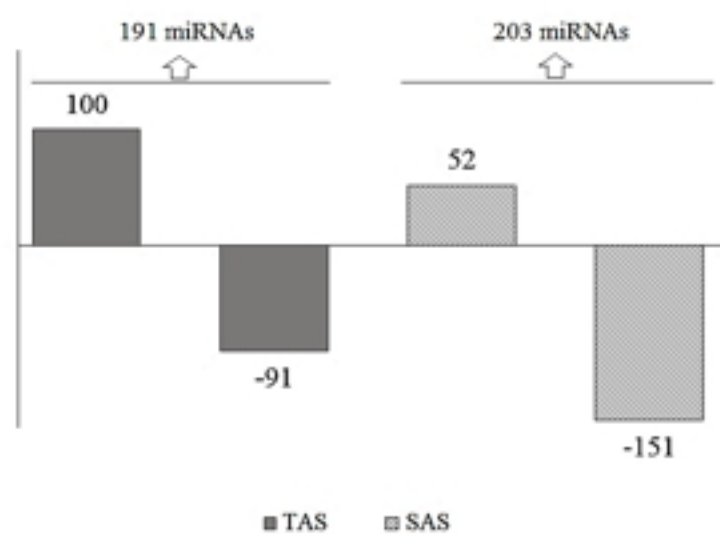

(C)

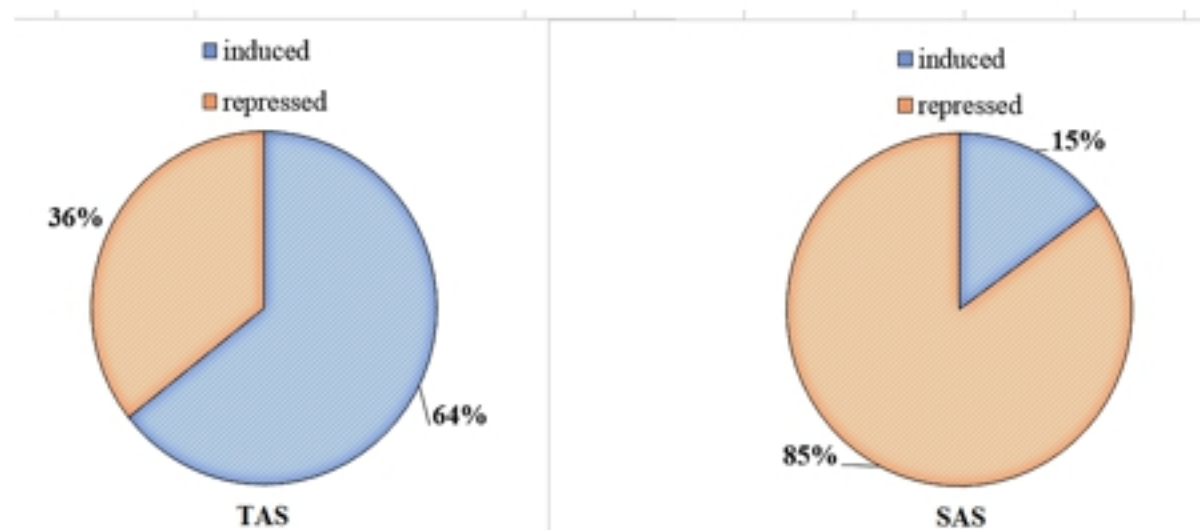

Figure

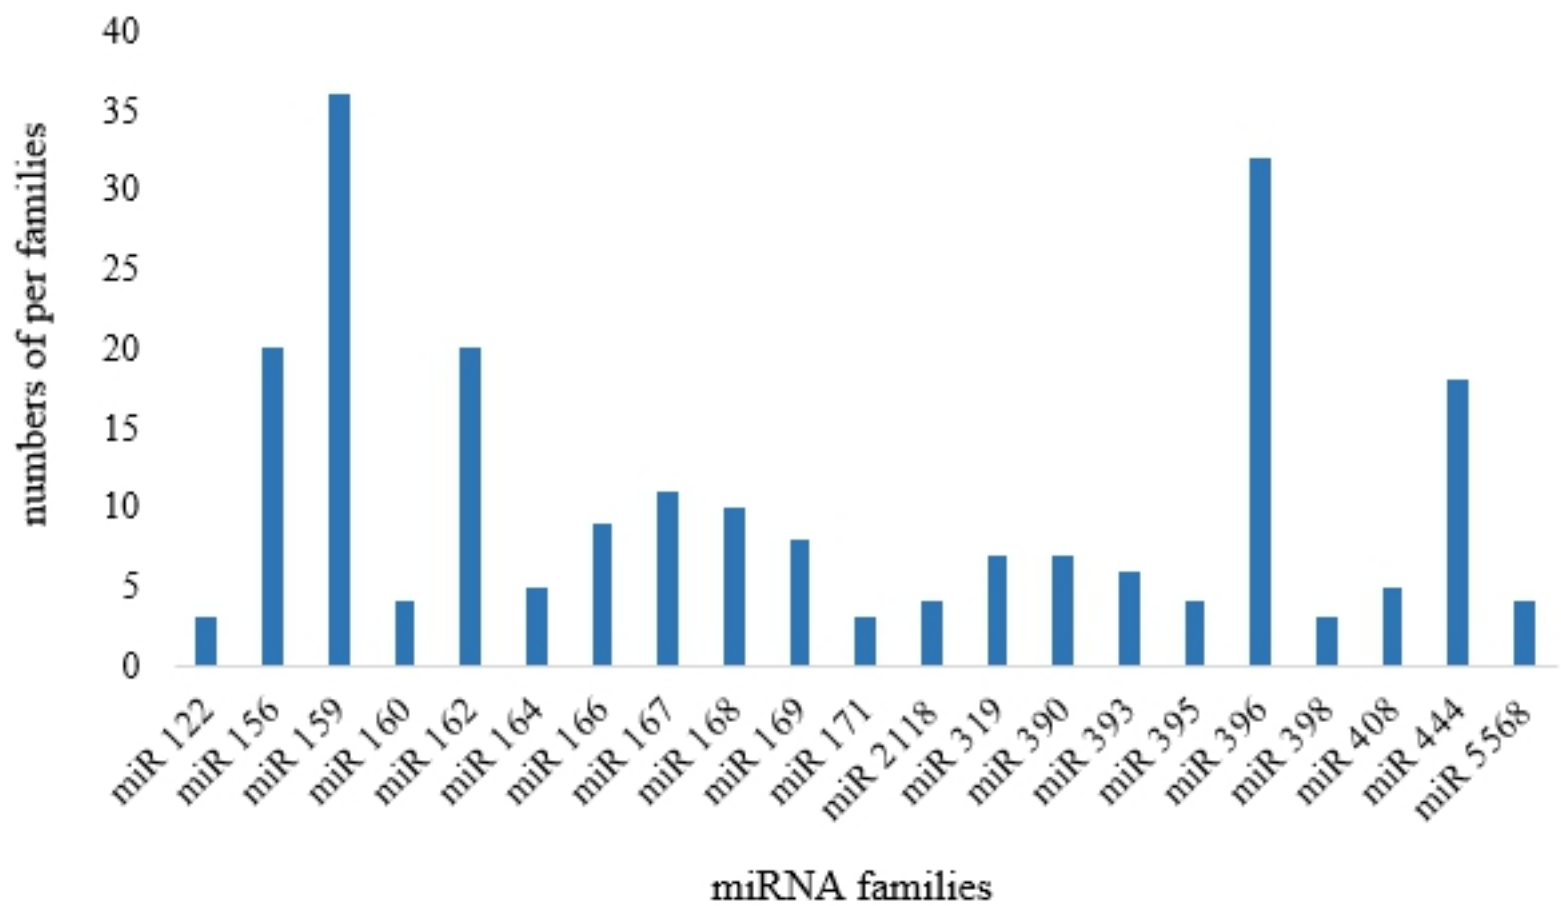

Figure

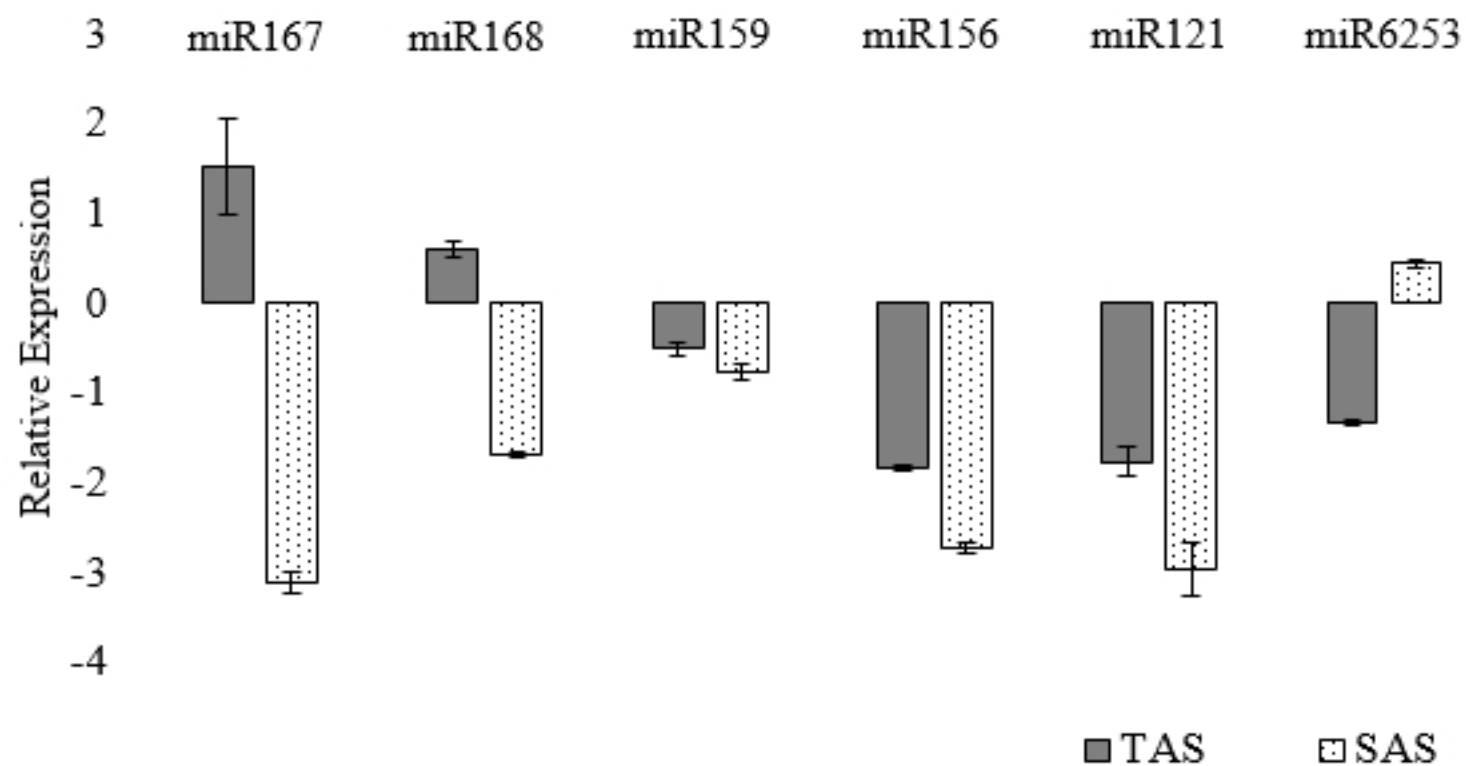

Figure
